# Supplementary material for: Formation, structure and physical properties of a series of α-MoO3 nanocrystals: from 3D to 1D and 2D
Source: Royal Society of Chemistry journal article supplement (doi:10.1039/c2ce06567c), 2012-01-01
Supplement: c2ce06567c.pdf [file c2ce06567c.pdf]

# Supporting Information

## Formation, Structure and Physical Properties of a Series of $\alpha$ -MoO<sub>3</sub> Nanocrystals: from 3D to 1D and 2D

Le Xin Song<sup>\*a,b</sup>, Juan Xia<sup>a</sup>, Zheng Dang<sup>a</sup>, Jun Yang<sup>a</sup>, Liang Bing Wang<sup>a</sup> and Jie Chen<sup>a</sup>

<sup>a</sup>Department of Chemistry, University of Science and Technology of China, Hefei 230026, P. R. China

<sup>b</sup>State Key Laboratory of Coordination Chemistry, Nanjing University, Nanjing 210093, P. R. China

solexin@ustc.edu.cn

### A list of the contents for all the supporting information

| Page | Contents                                                                                                                      |
|------|-------------------------------------------------------------------------------------------------------------------------------|
| 1    | A table of contents page                                                                                                      |
| 2    | Figure 1. XRD patterns of samples <b>5</b> (a), <b>6</b> (b), <b>7</b> (c) and <b>8</b> (d).                                  |
| 3    | Figure 2. XRD patterns of samples <b>9</b> (a), <b>10</b> (b), <b>11</b> (c), <b>12</b> (d), <b>13</b> (e) and <b>14</b> (f). |
| 4    | Figure 3. XRD patterns of samples <b>15</b> (a), <b>16</b> (b), <b>17</b> (c) and <b>18</b> (d).                              |
| 5    | Figure 4. XPS patterns of samples <b>5~18</b> .                                                                               |
| 6    | Figure 5. Raman patterns of samples (a) <b>15</b> , (b) <b>16</b> and (c) <b>17</b> .                                         |
| 7    | Figure 6. PL spectra of samples <b>2</b> , <b>3</b> , <b>5~14</b> , <b>15</b> and <b>18</b> .                                 |

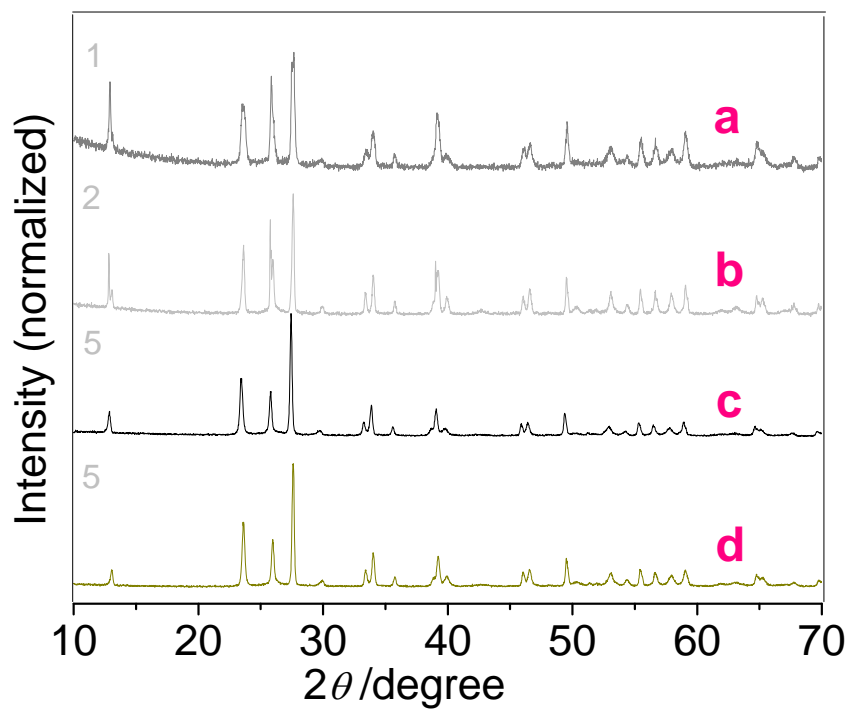

**Figure 1.** XRD patterns of samples **5** (a), **6** (b), **7** (c) and **8** (d). Relative signal intensity was normalized to the intensity of the peak at  $27.4^\circ$  in curve a.

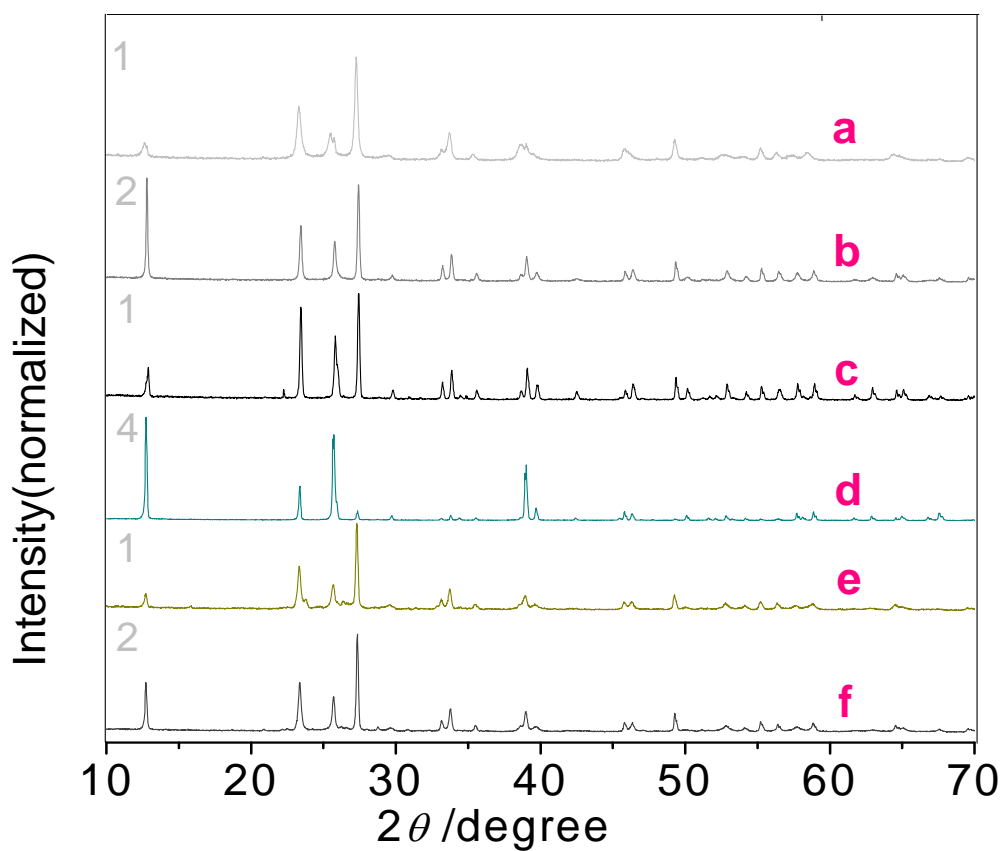

**Figure 2.** XRD patterns of samples **9** (a), **10** (b), **11** (c), **12** (d), **13** (e) and **14** (f). Relative signal intensity was normalized to the intensity of the peak at  $27.4^\circ$  in curve a.

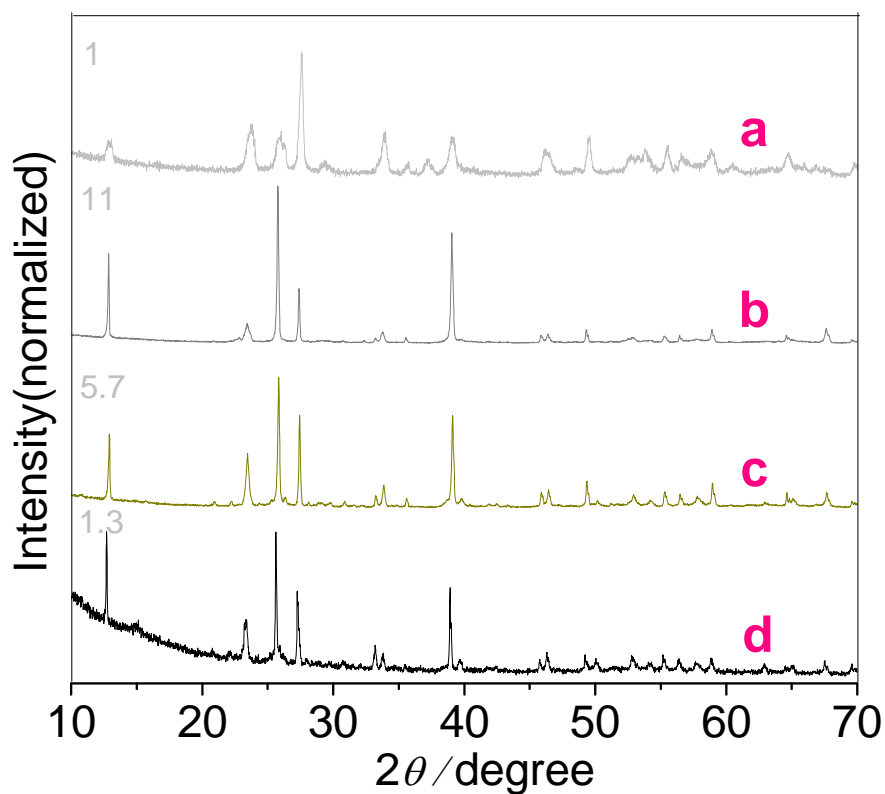

**Figure 3.** XRD patterns of samples **15** (a), **16** (b), **17** (c) and **18** (d). Relative signal intensity was normalized to the intensity of the peak at 27.4° in curve a.

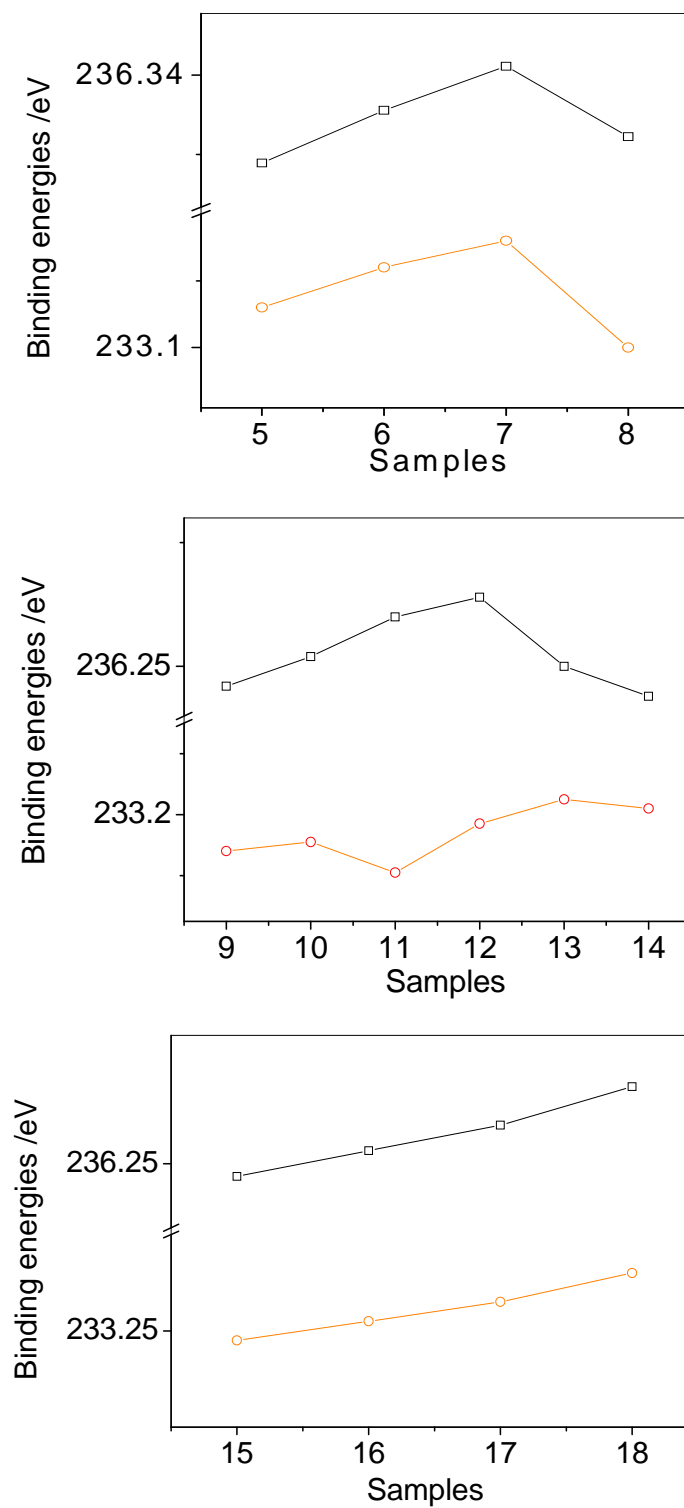

**Figure 4.** XPS patterns of samples 5~18, Mo 3d<sub>3/2</sub> (dark lines) and 3d<sub>5/2</sub> (orange lines).

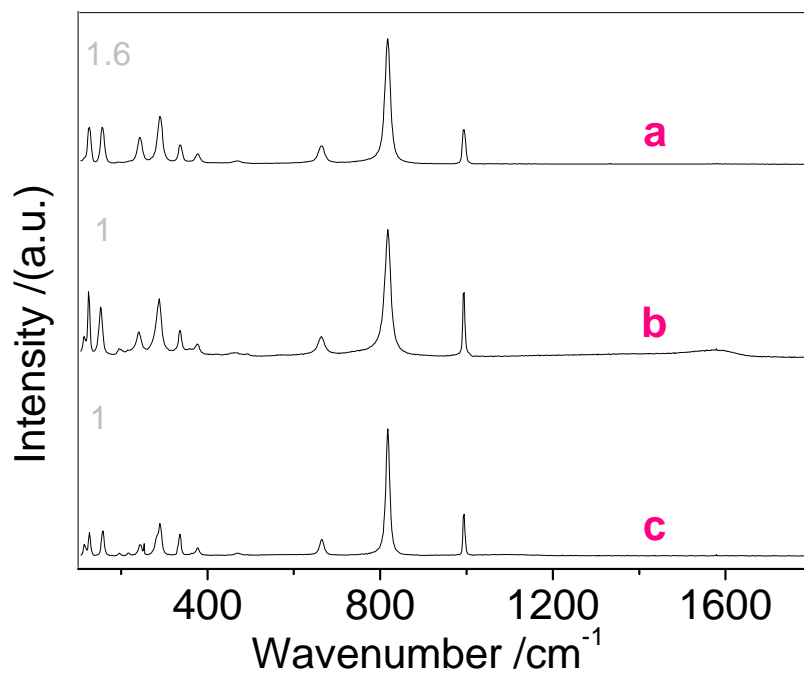

**Figure 5.** Raman patterns of samples **15** (a), **16** (b) and **17** (c).

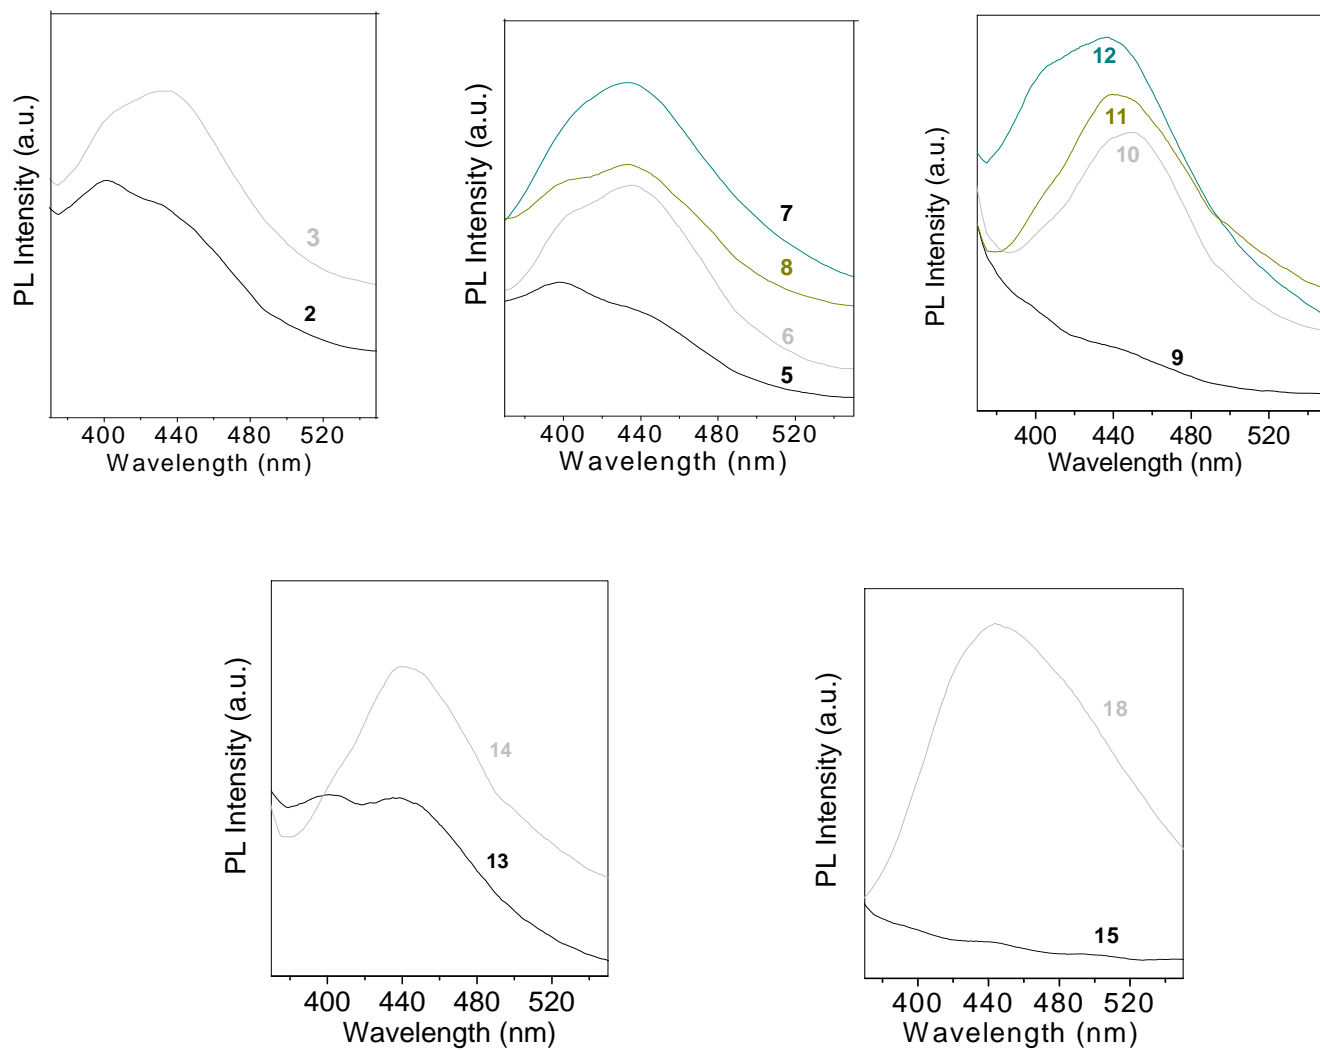

**Figure 6.** PL spectra of samples 2, 3, 5~14, 15 and 18.
